# Supplementary material for: Combination of body mass index and oxidized low density lipoprotein receptor 1 in prognosis prediction of patients with squamous non-small cell lung cancer
Source: PubMed Central journal article supplement (PMC4673147; doi:10.18632/oncotarget.4299), 2015-05-27
Supplement: oncotarget-06-22072-s001.pdf [file oncotarget-06-22072-s001.pdf]

## Combination of body mass index and oxidized low density lipoprotein receptor 1 in prognosis prediction of patients with squamous non-small cell lung cancer

### Supplementary Material

Supplemental Table S1: Univariate and multivariable analysis with prognostic role of OLR1 and BMI in PFS for patients with squamous non-small cell lung cancer

| Variables | Univariate analysis |             |         | Multivariable analysis |             |         |
|-----------|---------------------|-------------|---------|------------------------|-------------|---------|
|           | HR                  | 95%CI       | P value | HR                     | 95%CI       | P value |
| BMI       | 1.635               | 1.151-2.138 | 0.022   | 1.145                  | 1.084-1.432 | 0.019   |
| OLR1      | 3.592               | 2.544-5.072 | <0.001  | 3.541                  | 2.514-4.988 | <0.001  |
